# Supplementary material for: Multiple Mechanisms of Flaxseed: Effectiveness in Inflammatory Bowel Disease
Source: Evid Based Complement Alternat Med. 2020 Jul 12;2020:7974835. doi: 10.1155/2020/7974835 (PMC7374215; doi:10.1155/2020/7974835)
Supplement: Supplementary Materials — Supplementary Table 1: Multiple scoring criteria to assess microscopic damage in the colon of mice. Supplementary Table 2: Microscopic scoring of H and E stained and PAS-AB stained colon sections of mice after treatment with Fs.Cr and Flaxseed oil. Supplementary Table 3: Colony count of EPEC, ETEC. and EAEC after treatment with Fs.Cr and Flaxseed oil. Supplementary Figure 1: HPLC fingerprint analysis of Flaxseed oil. Supplementary Figure 2 (A-B): Bar charts show effect on colony counts of ∼106 enteropathogenic E. coli (EPEC) incubated with and without Fs.Cr for 16 hrs (A) and 2 hrs (B). Doses of 1 and 2.5 mg of Fs.Cr were used for assay time of 16 hrs, whereas doses of 0.05 and 0.1 mg (50 and 100 µg/ml) of Fs.Cr were used when assay time was 2 hrs (B). Supplementary Figure 3 (A-B): Bar charts show effect on colony counts of ∼106 enterotoxigenic E. coli (ETEC) incubated with and without Fs.Cr for 16 hrs (A) and 2 hrs (B). Doses of 1 and 2.5 mg of Fs.Cr were used for assay time of 16 hrs, whereas doses of 0.05 and 0.1 mg (50 and 100 µg/ml) of Fs.Cr were used when assay time was 2 hrs (B). Supplementary Figure 4 (A-B): Bar charts show the effect on colony counts of ∼106 enteroaggregative E. coli (EAEC) incubated with and without Flaxseed extract (Fs.Cr) for 16 hrs (A) and 2 hrs (B). Doses of 1 and 2.5 mg of Fs.Cr were used for assay time of 16 hrs, whereas doses of 0.05 and 0.1 mg (50 and 100 µg/ml) of Fs.Cr were used when assay time was 2 hrs (B). [file 7974835.f1.pdf]

**Supplementary TABLE 1: Multiple scoring criteria to assess microscopic damage in the colon of mice.:**

| Scoring type                         |                     | Scoring variables                                                                                                 | Microscopic Score |
|--------------------------------------|---------------------|-------------------------------------------------------------------------------------------------------------------|-------------------|
| Neurath Score <sup>1</sup>           |                     | no leukocyte infiltration                                                                                         | 0                 |
|                                      |                     | low level of leukocyte infiltration                                                                               | 1                 |
|                                      |                     | moderate level of leukocyte infiltration                                                                          | 2                 |
|                                      |                     | moderate level of leukocyte infiltration, high vascular density and thickening of colon wall                      | 3                 |
|                                      |                     | transmural leukocyte infiltration, loss of goblet cells, high vascular \density and thickening of the colon wall. | 4                 |
| Vilaseca Modified Score <sup>2</sup> | Ulceration          | No ulcer, epithelization; Small ulcers,< 3 mm; Large ulcers > or equal to 3 mm = score 0,1,2, respectively        | 0                 |
|                                      |                     |                                                                                                                   | 1                 |
|                                      |                     |                                                                                                                   | 2                 |
|                                      | Inflammation        | None                                                                                                              | 0                 |
|                                      |                     | Mild                                                                                                              | 1                 |
|                                      |                     | Moderate                                                                                                          | 2                 |
|                                      |                     | Severe                                                                                                            | 3                 |
|                                      | Depth of the lesion | None                                                                                                              | 0                 |
|                                      |                     | Submucosa                                                                                                         | 1                 |
|                                      |                     | Muscularis propria                                                                                                | 2                 |
|                                      |                     | Serosa                                                                                                            | 3                 |
| Mucin scoring <sup>4</sup>           |                     | <1% of stained cells                                                                                              | 0                 |
|                                      |                     | 1-30% of stained cells; low level of staining;                                                                    | 1                 |
|                                      |                     | 30-80% of stained cells; medium level of staining                                                                 | 2                 |
|                                      |                     | Up to 80% of stained cells; high level of staining                                                                | 3                 |

The semi-quantitative scoring system assessed the microscopic damage in AA induced colitic mice, treated with and without Fs.Cr, and then stained with H and E. This scoring was performed by a histopathologist who was blinded to the treatment. The criteria includes Neurath score (0-4)(15), Vilaseca score (the sum of ulceration with maximum score 2, inflammation with maximum score 3 and depth of lesion with maximum score 3) (16). Goblet cells were assessed on the basis of level of mucin staining 4(17).

**Supplementary Table 2: Microscopic Scoring score of H & E stained and PAS-Ab stained colon sections of mice after treatment with Fs.Cr and Flaxseed oil**

|                |                 | Flaxseed Oil Score ( % ) | Extract              |
|----------------|-----------------|--------------------------|----------------------|
| Vilaseca Score | Ulceration      |                          |                      |
|                | Untreated       | 1.6±0.1#                 | 1.75±0.14#           |
|                | 150 mg/kg       | 1.55±0.1 (96.87%)        | 1.33±0.19 (76%)      |
|                | 300 mg/kg       | 1.2±0.16 (75%)           | 0.8±0.09** (44%)     |
|                | 500 mg/kg       | 0.36±0.5** (22.5%)       | 1.11±0.2 *(63.42%)   |
|                | Inflammation    |                          |                      |
|                | Untreated       | 2.2±0.05#                | 2±0.01#              |
|                | 150 mg/kg       | 2.15±0.09 (97.72%)       | 1.83±0.18 (91.5%)    |
|                | 300 mg/kg       | 1.9±0.2 (86.36%)         | 1±0.09*** (50%)      |
|                | 500 mg/kg       | 1.42±0.22** (64.54%)     | 1.42±0.28 (57.5%)    |
|                | Depth of lesion |                          |                      |
|                | Untreated       | 2.29±0.05#               | 2.60±0.07#           |
|                | 150 mg/kg       | 2.4±0.05 (92.3%)         | 2.1±0.06 * (76.92%)  |
|                | 300 mg/kg       | 2±0.22** (76.92%)        | 1.2±0.05*** (45%)    |
|                | 500 mg/kg       | 1.5±0.1*** (57.69%)      | 1.6±0.09*** (61.53%) |
| Neurath Score  | Untreated       | 3.4±0.5#                 | 3.48±0.65#           |
|                | 150 mg/kg       | 3.1±0.09 (91.17%)        | 2.33±0.57 (66.95%)   |
|                | 300 mg/kg       | 2.5±0.16** (73.52%)      | 1.56±0.5** (44.82%)  |
|                | 500 mg/kg       | 1.5±0.02*** (44.11%)     | 1.70±0.03** (48.85%) |
|                |                 | Score (% increase)       | Score (% increase)   |
| Mucin Score    | Untreated       | 1.4±0.2                  | 1.2±0.37#            |
|                | 150 mg/kg       | 1.36±0.04 (97.14%)       | 1.5±0.25 (125%)      |
|                | 300 mg/kg       | 1.9±0.05* (135.71%)      | 2.1±0.25*** (175%)   |
|                | 500 mg/kg       | 2±0.16** (142.28%)       | 2.3±0.5*** (191.66%) |

ULCERATION: 1[No ulcer, epithelialization; Small ulcers, < 3 mm; Large ulcers > or equal to 3 mm = score 0, 1, 2, respectively]; INFLAMMATION: 2 [None, Mild, Moderate, Severe; 0, 1, 2, 3]; DEPTH OF LESION: 3 [None, Mucosa, Muscularis Propria, Serosa; 0, 1, 2, 3] NEURATH SCORE: 4 [No leukocyte infiltration; Low level of leukocyte infiltration; Moderate level of leukocyte infiltration; Moderate level of leukocyte infiltration, high vascular density and thickening of colon wall; Transmural leukocyte infiltration, loss of goblet cells, high vascular density and thickening of the colon wall = score 1; 2; 3; 4]; MUCIN SCORE: 4 [<1% of stained cells; 1-30% of stained cells (low level of staining); 30-80% of stained cells (medium level of staining); Up to 80% of stained cells (high level of staining) = score 0, 1, 2, 3]

**Supplementary Table 3: Colony count of *EPEC*, *ETEC* and *EAEC* after treatment with Fs.Cr and Flaxseed oil**

| <b><i>EPEC</i> (c.f.u.)</b> |             |                  |           |
|-----------------------------|-------------|------------------|-----------|
| OI                          | 1.13E+06#   | OI               | 1.36E+06# |
| Negative control            | 1.60E+06    | Negative control | 2.45E+06  |
| Flaxseed oil (9 µg/ml)      | 1.27E+03*** | Fs.Cr 50 µg/ml   | 8.50E+05  |
| Flaxseed oil (14 µg/ml)     | 1.14E+03*** | Fs.Cr 100 µg/ml  | 1.45E+05* |
| <b><i>ETEC</i> (c.f.u.)</b> |             |                  |           |
| OI                          | 1.11E+06#   | OI               | 1.11E+06  |
| Negative control            | 1.53E+06    | Negative control | 7.23E+06  |
| Flaxseed oil (9 µg/ml)      | 2.63E+04*** | Fs.Cr 50 µg/ml   | 2.67E+06  |
| Flaxseed oil (14 µg/ml)     | 1.40E+04*** | Fs.Cr 100 µg/ml  | 7.25E+05  |
| <b><i>EAEC</i> (c.f.u.)</b> |             |                  |           |
| OI                          | 1.17E+06#   | OI               | 1.17E+06  |
| Negative control            | 1.67E+06    | Negative control | 1.25E+06  |
| Flaxseed oil (9 µg/ml)      | 1.42E+03    | Fs.Cr 50 µg/ml   | 1.30E+06  |
| Flaxseed oil (14 µg/ml)     | 2.03E+03    | Fs.Cr 100 µg/ml  | 2.77E+05  |

Assay used LB as an assay buffer with 2 hrs of incubation time. Bacteria corresponding to o.d. = 0.22 (~106 c.f.u.) were used for the assay. Values given are means±SEM of 3 experiments (n = 12). One way ANOVA was used for statistical analysis followed by Tukey's post test. \*\*p<0.01; \*\*\*p<0.001 compared with untreated group (#). ; Fs.Cr = methanolic-aqueous crude extract of Flaxseed; OI = original inoculum

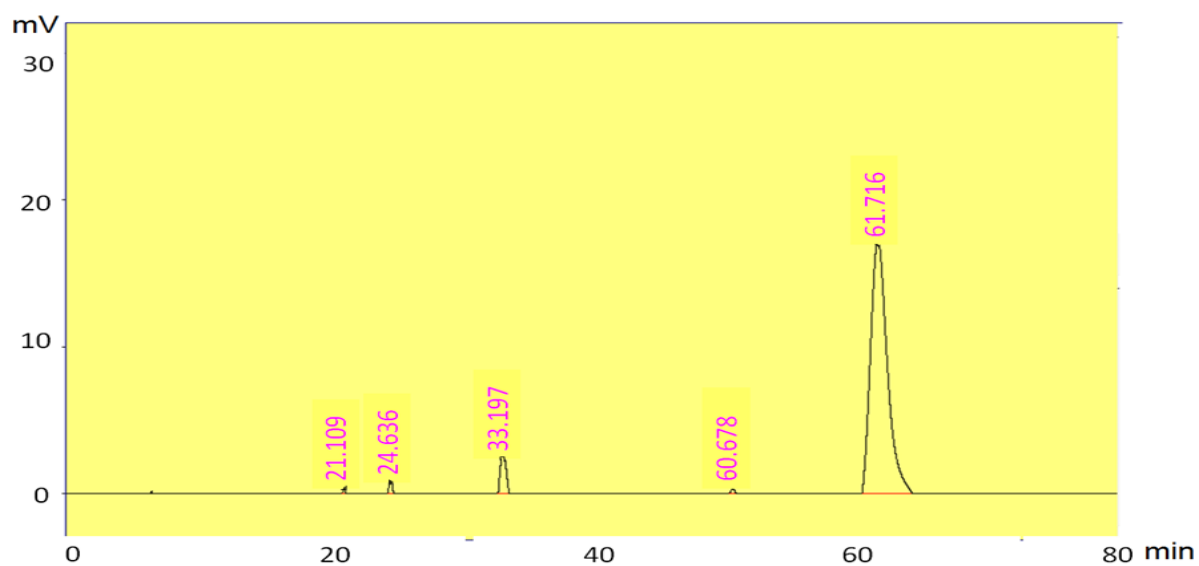

**Supplementary Figure 1: Fingerprint analysis of Flaxseed oil.**

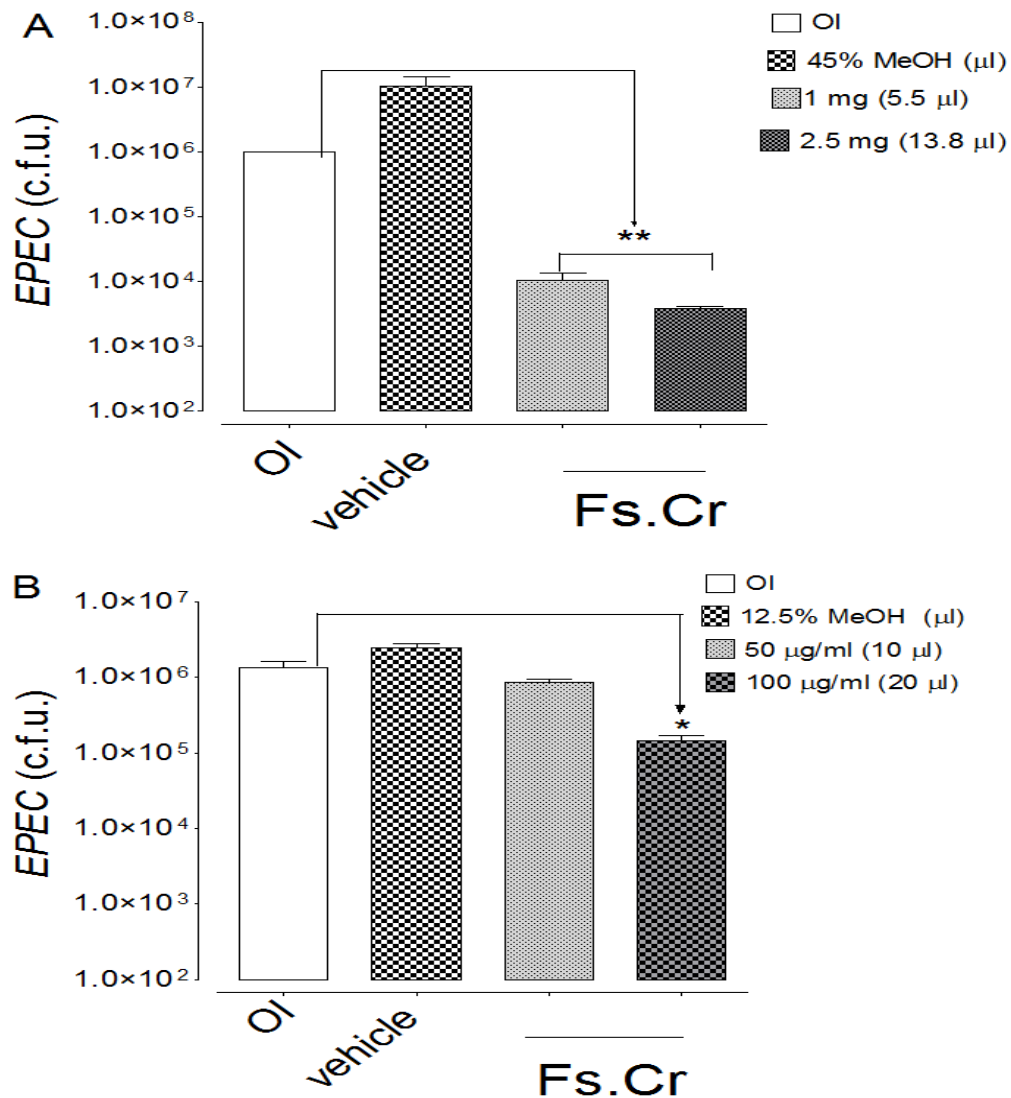

**Supplementary Figure 2 (A-B);** Bar-charts show effect on colony counts of  $\sim 10^6$  enteropathogenic *E. coli* (EPEC) incubated with and without Fs.Cr for 16 hrs (A), and 2 hrs (B). Doses of 1 and 2.5 mg of Fs.Cr were used for assay time of 16 hrs, whereas, doses of 0.05 and 0.1 mg (50 and 100 µg/ml) of Fs.Cr were used when assay time was 2 hrs (B). The same corresponding volume of vehicle solvent was used in vehicle control group in 200 µl assay volume with Luria broth (LB) as assay buffer, incubated at 37°C. Original inoculum (OI) is the approximate concentration of microbes plated before running assay (od = 0.22~106 c.f.u.). 100 µg/ml gentamycin was used as positive control not shown in graph (100% kill). The data are presented as the means $\pm$ SEM of three independent experiments performed in duplicate. p-values were calculated by comparing OI and different extract concentrations using un-paired t- test. \*, \*\*, \*\*\* indicate  $p < 0.05$ ,  $p < 0.01$  and  $p < 0.001$  vs. OI.

[Symbols: Fs.Cr = Flaxseed extract; OI = original inoculum; od = optical density; LB = Luria broth; EPEC = enteropathogenic *Escherichia coli*; vehicle = 45% methanol (A); 12.5% MeOH for B].

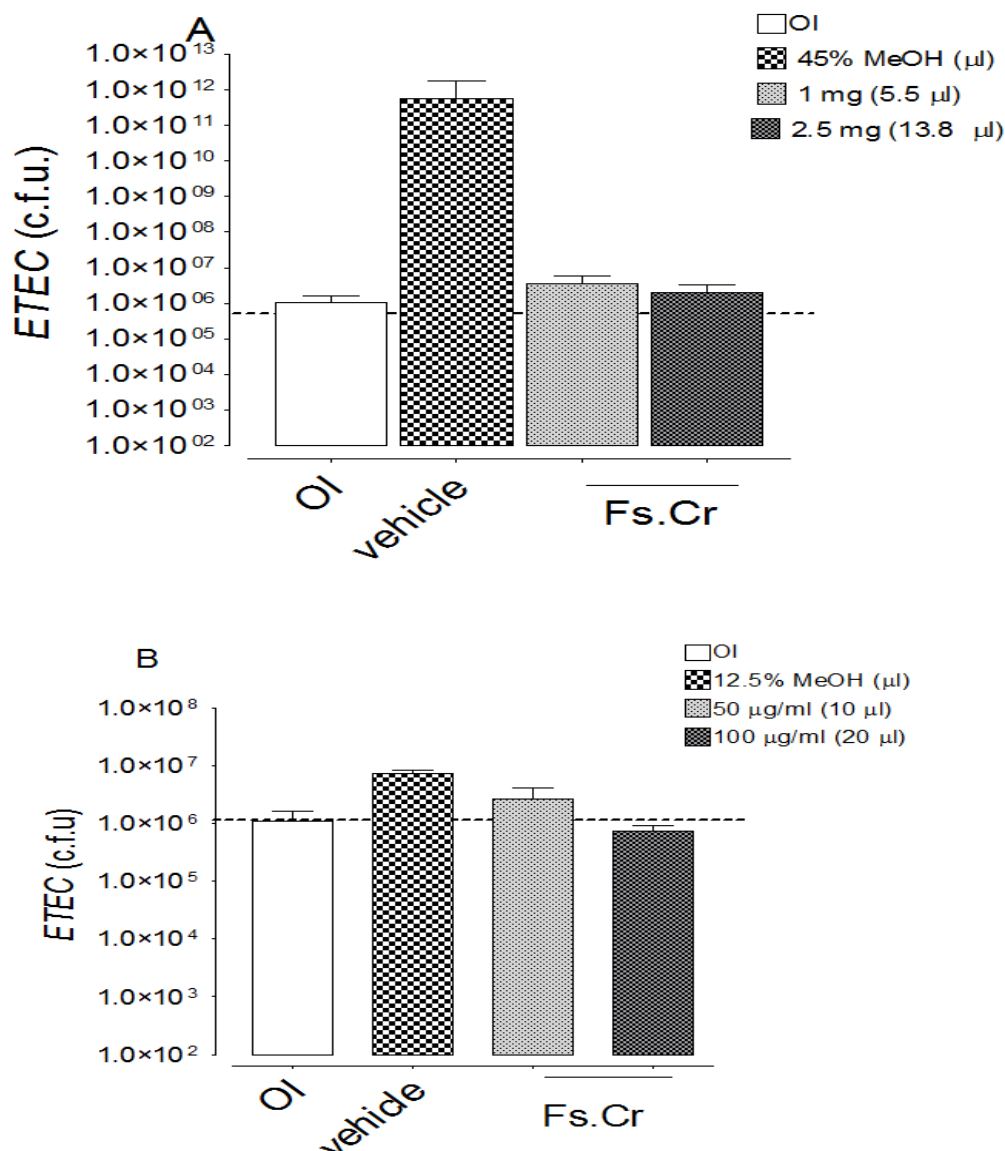

**Supplementary Figure. 3 (A-B);** Bar-charts show effect on colony counts of  $\sim 10^6$  enterotoxigenic *E. coli* (ETEC) incubated with and without Fs.Cr for 16 hrs (A), and 2 hrs (B). Doses of 1 and 2.5 mg of Fs.Cr were used for assay time of 16 hrs, whereas, doses of 0.05 and 0.1 mg (50 and 100  $\mu$ g/ml) of Fs.Cr were used when assay time was 2 hrs (B). The same corresponding volume of vehicle solvent was used in vehicle control group in 200  $\mu$ l assay volume with Luria broth (LB) as assay buffer, incubated at 37°C. Original inoculum (OI) is the approximate concentration of microbes plated before running assay (od = 0.22– $10^6$  c.f.u.). 100  $\mu$ g/ml gentamycin was used as positive control not shown in graph (100% kill). The data are presented as the means $\pm$ SEM of three independent experiments performed in duplicate. *p*-values were calculated by comparing OI and different extract concentrations using un-paired *t*-test.

[Symbols: Fs.Cr = Flaxseed extract; OI = original inoculum; od = optical density; LB = Luria broth; ETEC = enterotoxigenic *Eschericia coli*; vehicle = 45% methanol (A); 12.5% MeOH (B)].

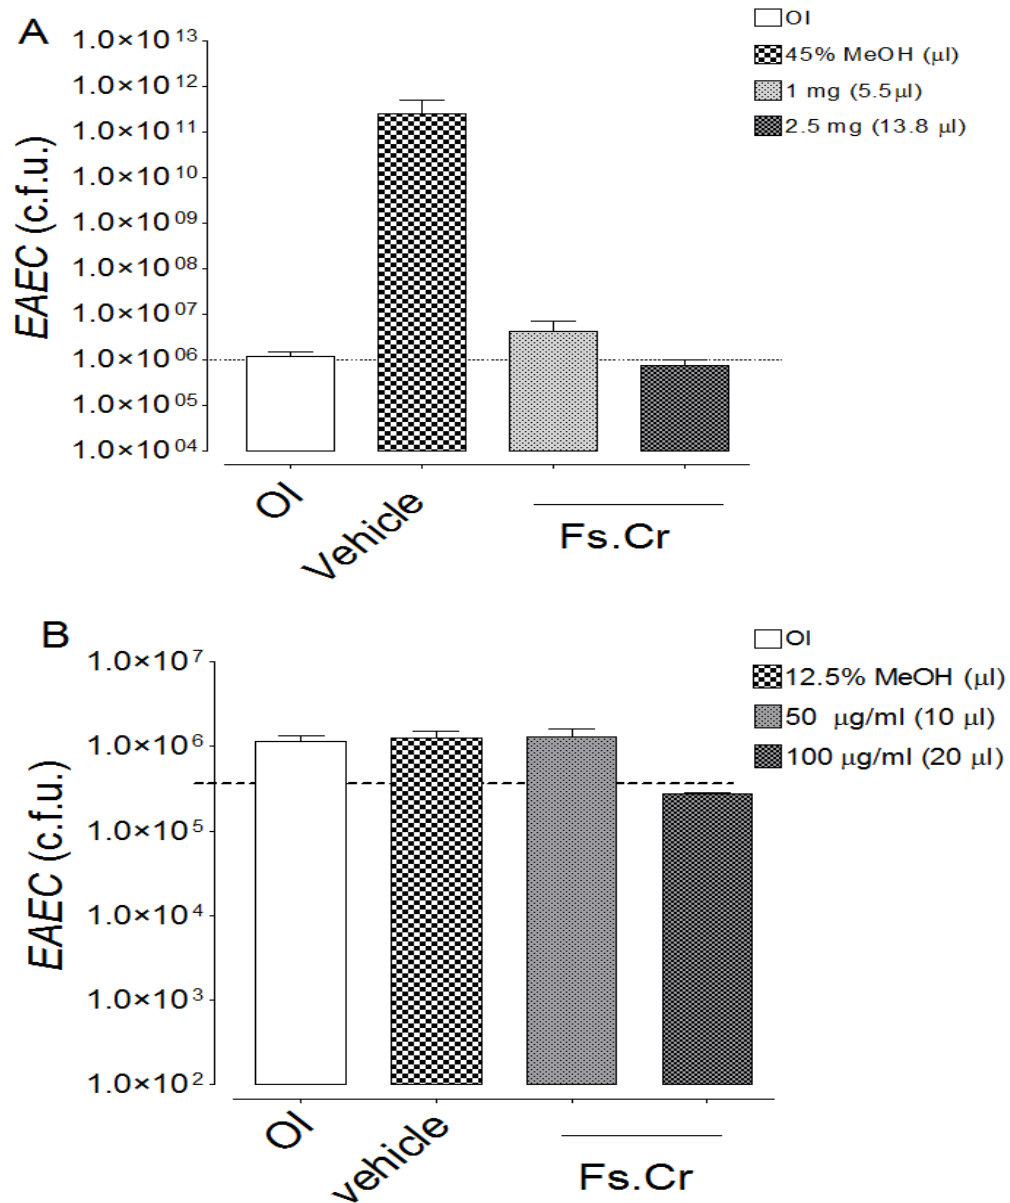

**Supplementary Figure. 4 (A-B);** Bar-charts show effect on colony counts of  $\sim 10^6$  enteroaggregative *E. coli* (EAEC) incubated with and without Flaxseed extract (Fs.Cr) for 16 hrs (A) and 2 hrs (B). Doses of 1 and 2.5 mg of Fs.Cr were used for assay time of 16 hrs, whereas, doses of 0.05 and 0.1 mg (50 and 100  $\mu$ g/ml) of Fs.Cr were used when assay time was 2 hrs (B). The same corresponding volume of vehicle solvent was used in vehicle control group in 200  $\mu$ l assay volume with Lurea broth (LB) as assay buffer, incubated at 37°C. Original inoculum (OI) is the approximate concentration of microbes plated before running assay (od =  $0.22 \sim 10^6$  c.f.u.). 100  $\mu$ g/ml gentamycin was used as positive control not shown in graph (100% kill). The data are presented as the means  $\pm$  SEM of three independent experiments performed in duplicate. *p*-values were calculated by comparing OI and different extract concentrations using un-paired *t*- test.

[Symbols: Fs.Cr = Flaxseed extract; OI = original inoculum; od = optical density; LB = Luria broth; EAEC = enteroaggregative *Escherichia coli*; vehicle = 45% methanol (A); 12.5% MeOH (B)].
